# Supplementary material for: Dynamics of the Phosphoinositide 3-Kinase p110δ Interaction with p85α and Membranes Reveals Aspects of Regulation Distinct from p110α
Source: PubMed Central journal article supplement (PMC3155019; doi:10.1016/j.str.2011.06.003), 2011-08-10
Supplement: mmc1.pdf [file mmc1.pdf]

## Supplemental Information

### Dynamics of the Phosphoinositide 3-Kinase p110 $\delta$

### Interaction with p85 $\alpha$ and Membranes Reveals

### Aspects of Regulation Distinct from p110 $\alpha$

John E. Burke, Oscar Vadas, Alex Berndt, Tara Finegan, Olga Perisic, and Roger L. Williams

**Fig. S1.** PI3K domains and peptide coverage after pepsin digestion. A. Constructs purified and examined are shown with sequence numbers corresponding to the p110 $\delta$  gene sequence, and p85 $\alpha$  gene sequence. B. Pepsin digested peptide coverage map of p110 $\delta$  and p85 $\alpha$ . Identified and analyzed pepsin-digested peptides are shown under the primary sequence of p110 $\delta$  and p85 $\alpha$ . The primary sequences of p110 $\delta$  and p85 $\alpha$  are colored according to domain boundaries shown above. Gray bars indicate peptides continued in the next line of the sequence.

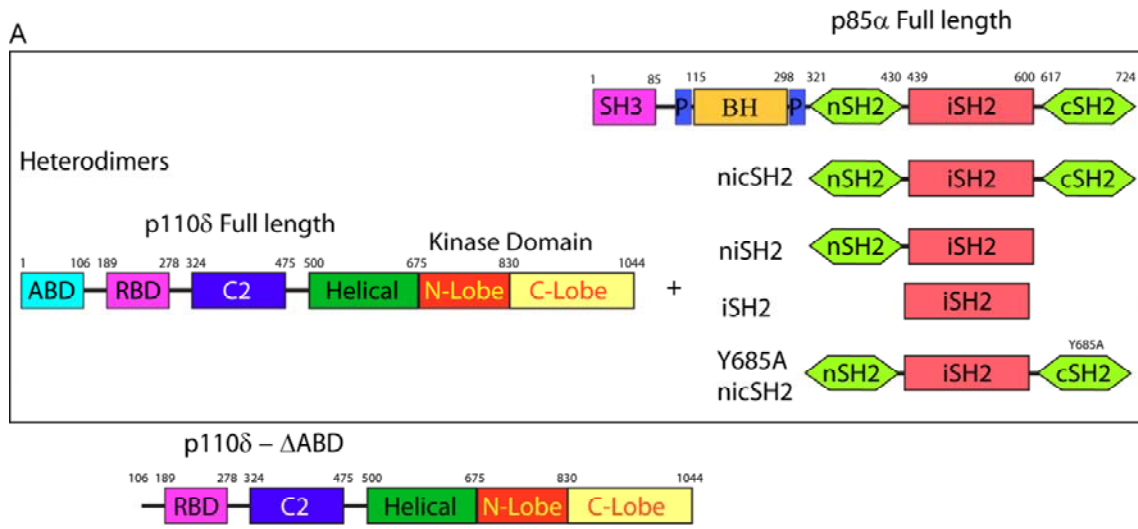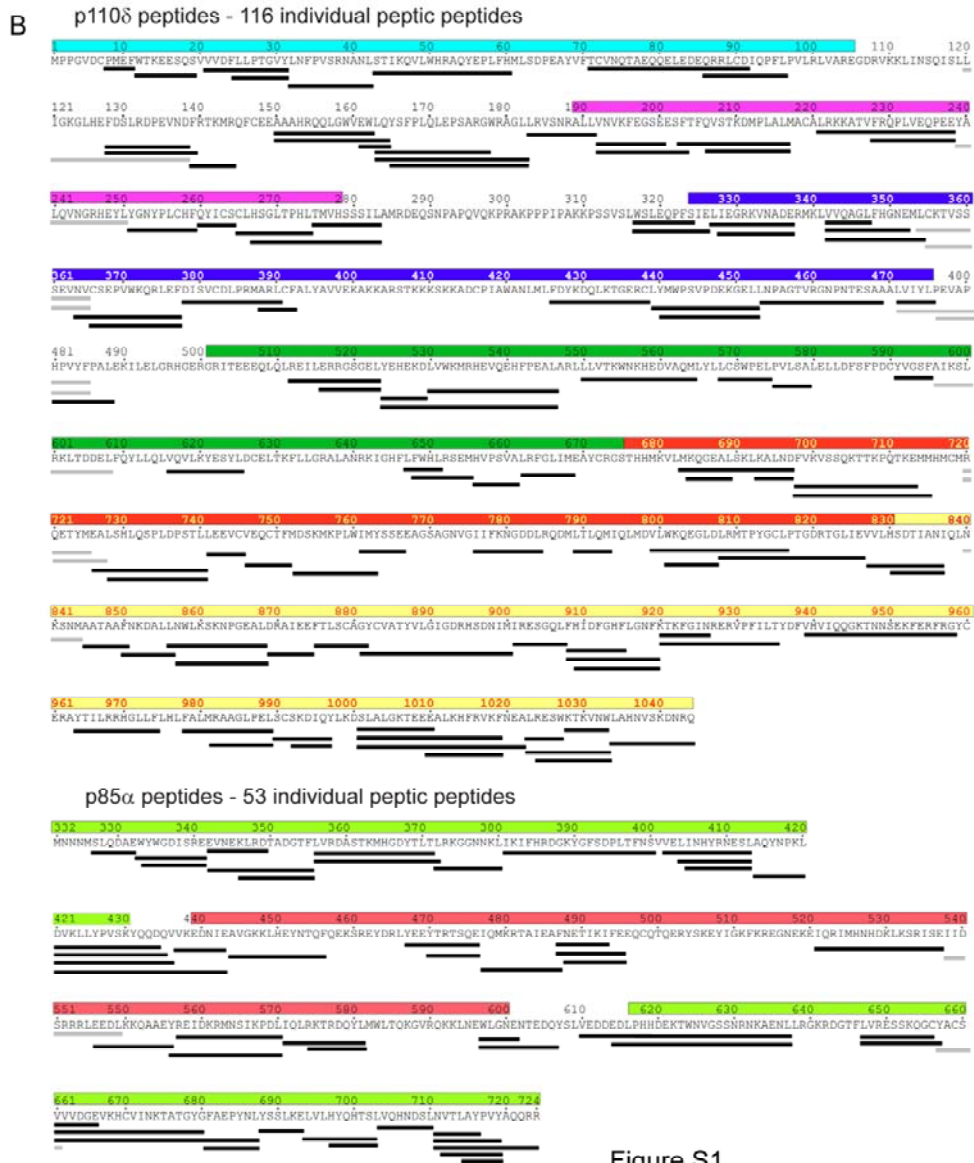

Figure S1

Fig. S2. Global exchange of  $\Delta$ ABD-p110 $\delta$  and p85 $\alpha$  nicSH2. **(A)** The relative deuteration levels for the  $\Delta$ ABD-p110 $\delta$  construct at three time points (3, 100 and 3000 seconds) were mapped onto the crystal structure of this construct (2WXH). The color of the protein indicates relative deuterium levels. Areas of the protein with no peptide coverage are colored gray. **(B)** The relative deuteration levels of the p85 $\alpha$  nicSH2 construct (residues 322-724) in the context of complex with the full-length p110 $\delta$  are mapped onto three isolated crystal structures (2VIY for the iSH2, 2IUI for the nSH2, and 1H9O for the cSH2). The deuterium exchange rates correlated well to the crystal structure, with interior regions protected from exchange, and unstructured regions, surface loops, and regions with high crystallographic B factors having the highest exchange rates. The fastest exchanging peptides of the protein spanned the surface loop from 840-850, which was proposed to be one of the loops important for membrane binding in p110 $\alpha$  (Mandelker et al., 2009). Peptides covering the C-terminus of the protein, residues 1023-1044, and residues 920-926 from the substrate-binding loop, a critical loop for lipid substrate recognition (Bondeva et al., 1998) (also known as the activation loop by analogy with protein kinases), were also fully deuterated after only 3 seconds of on-exchange at 23 °C. This part of the substrate-binding loop is disordered in the p110 $\delta$  crystal structure (Berndt et al., 2010). Peptides covering the beginning of the substrate-binding loop from 908-919, which contain the DFG motif, were protected from exchange at early time points, but were almost fully deuterated at 3000 seconds of on-exchange. Peptides spanning the catalytic loop from 887-898, and a region of the helical domain from 530-564, remained protected from deuteration at all time points, indicating a rigid secondary structure or lack of solvent accessibility. The peptides spanning the iSH2 coiled coil domain from 467-570 showed very slow exchange rates at all time points. This is consistent with this domain serving as a rigid scaffold for p110 binding (Fu et al., 2004). However, peptides spanning the N-terminal and C-terminal ends from 436-443 and 582-606 of the iSH2 domain are both over 40% deuterated after 1000 seconds of on-exchange. The nSH2 and cSH2 domains showed similar rates of exchange to each other, as expected from the similarity of structures solved by both NMR and crystallography.

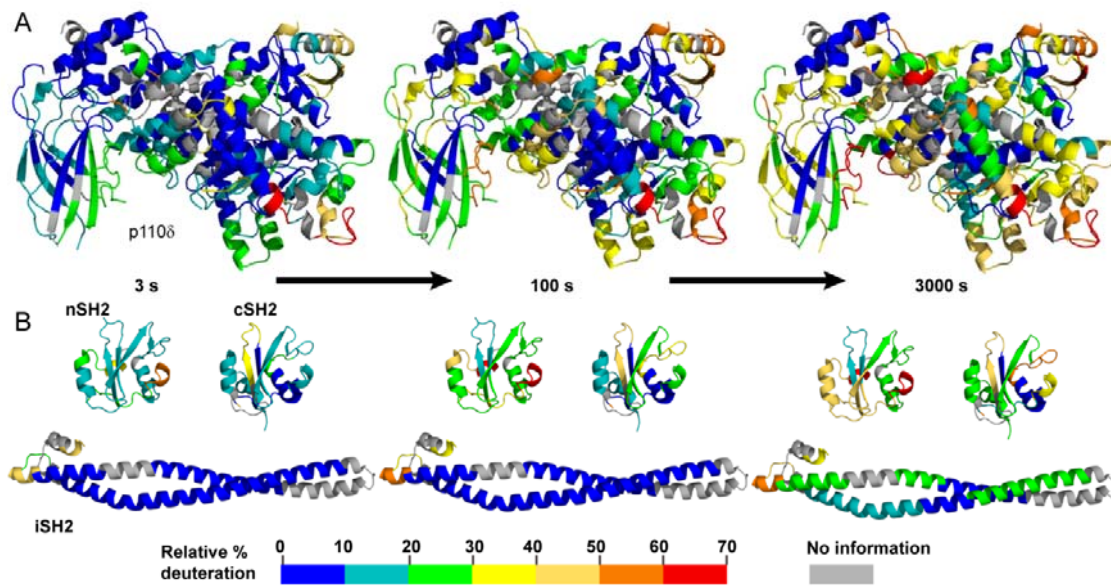

Fig. S2

**Fig. S3.** Changes in deuteration levels of the p85 $\alpha$  nicSH<sub>2</sub> construct in the presence and absence of PDGFR phosphopeptide (complement to main figure 2). Peptides spanning the p85 $\alpha$  regulatory

subunit that showed greater than 0.5 Da changes in deuteration level in the presence and absence of the nicSH<sub>2</sub> construct of p85 $\alpha$  are colored onto the structures (2VIY, 2IUI, and 1H9O) according to the legend. The structures of phosphopeptide bound to the cSH2 and nSH2 domains are colored purple in the figure. Peptides are labeled A-M. The graphs are labeled (\*) for any time point with a greater than 0.5 Da changes between the p110 $\delta$ / p85 $\alpha$  nicSH<sub>2</sub> +/- PDGFR phosphopeptide.

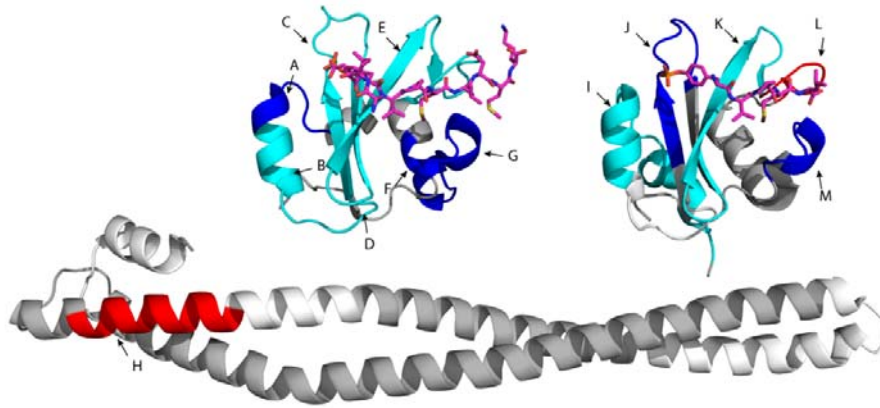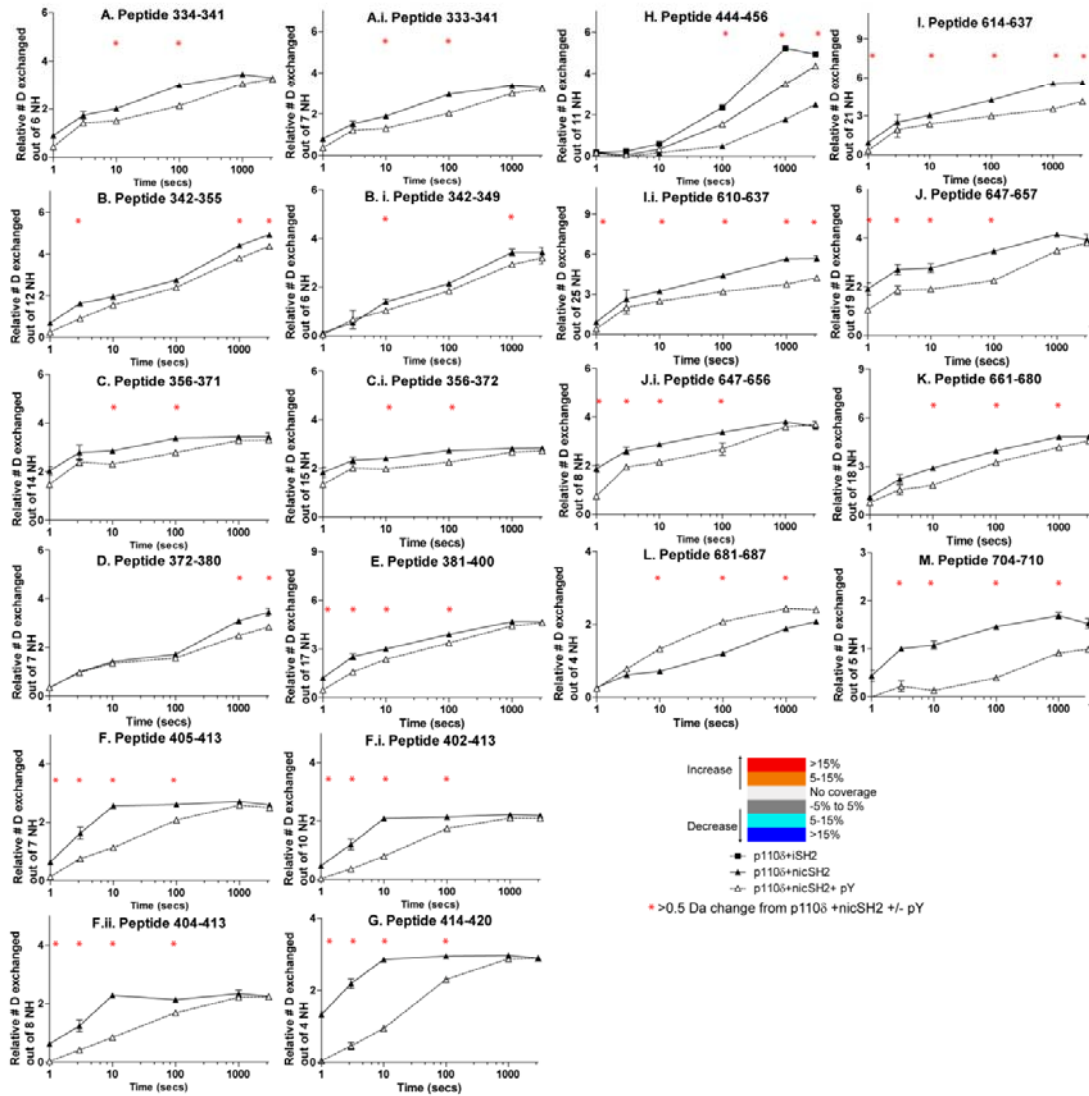

Figure S3

**Fig. S4.** Changes in deuteration levels of the free catalytic domain in the presence of both nicSH<sub>2</sub> p85 $\alpha$  and PDGFR phosphopeptide (complement to main figure 3). A. Peptides spanning the p110 $\delta$  catalytic subunit that showed greater than 0.5 Da changes in deuteration level in the presence and

absence of the nicSH<sub>2</sub> construct of p85 $\alpha$  are colored onto the structure (2WXH) according to the legend. Peptides are labeled A-I. B. Peptides spanning the p110 $\delta$  catalytic subunit that showed greater than 0.5 Da changes in deuteration level in the presence of nicSH<sub>2</sub> +/- a PDGFR phosphopeptide are colored onto the structure according to the legend. The graphs are labeled (\*) for any time points with a greater than 0.5 Da change between the  $\Delta$ ABD- p110 $\delta$  and p110 $\delta$  + nicSH<sub>2</sub> p85 $\alpha$  constructs, and labeled (\*) for any time point with a greater than 0.5 Da changes between the p110 $\delta$ / p85 $\alpha$  nicSH<sub>2</sub> +/- PDGFR phosphopeptide.

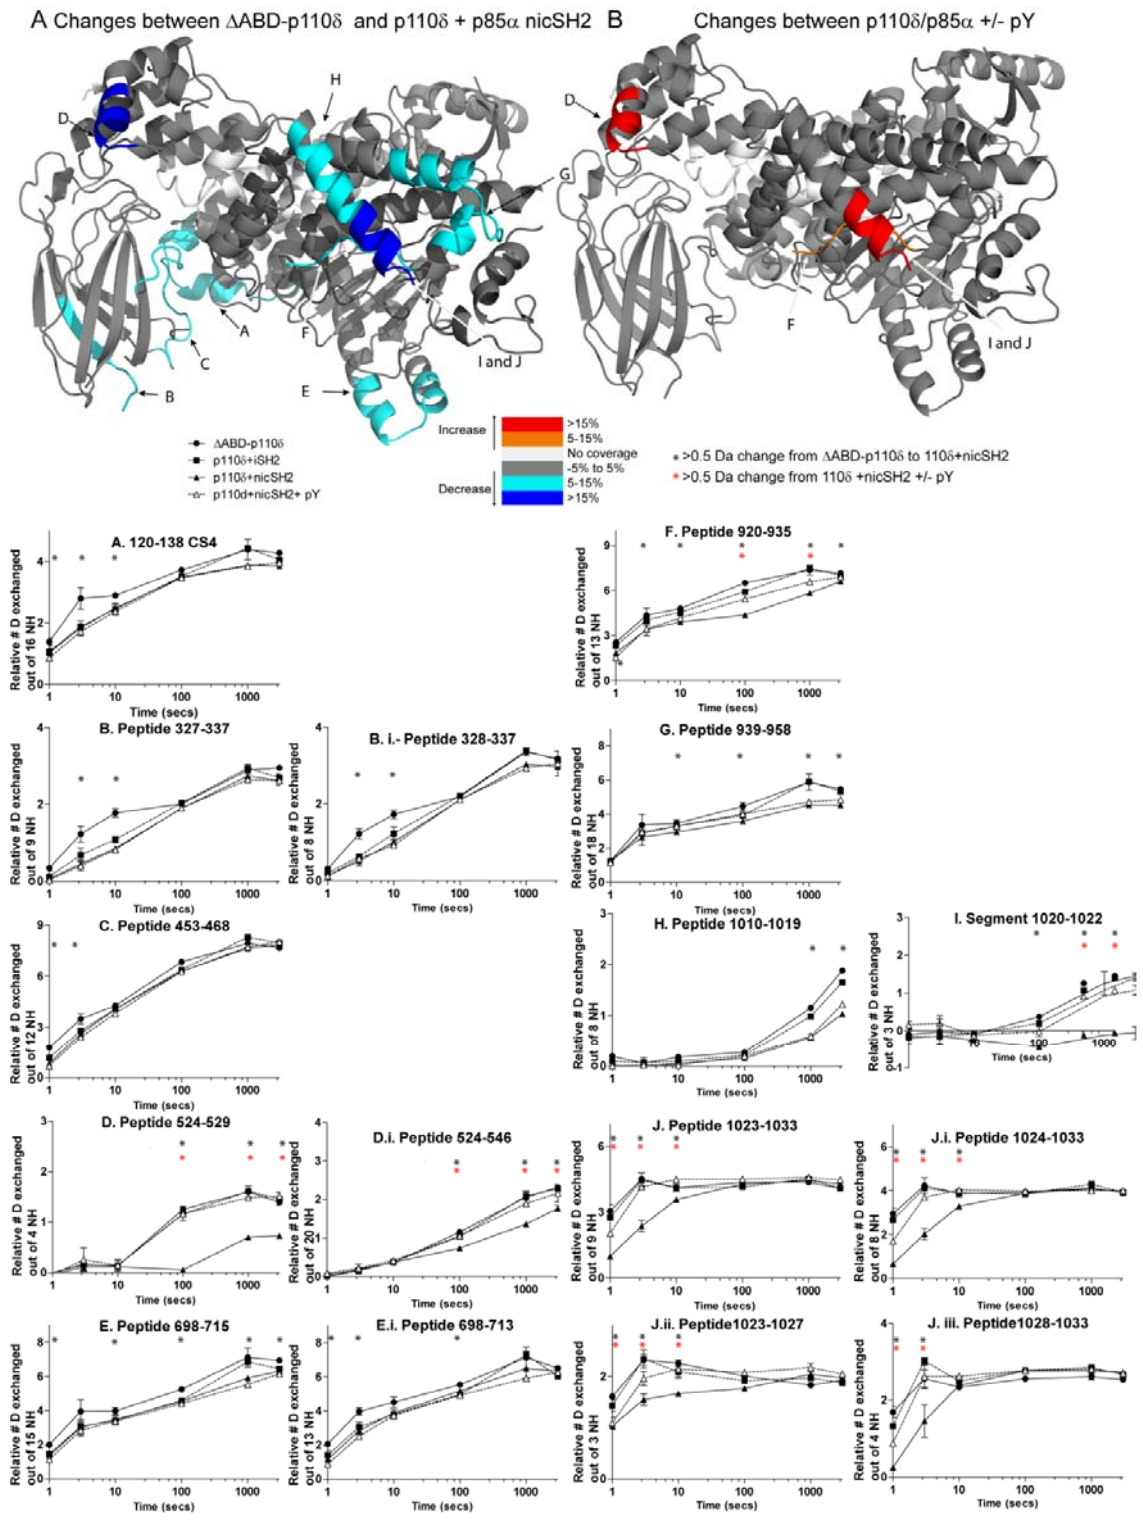

Figure S4

**Fig. S5.** Changes in deuteration levels of p110 $\delta$  catalytic subunit and p85 $\alpha$  regulatory subunit in the presence of lipid vesicles (complement to main figure 5). A model containing the iSH2 domain of p85 $\alpha$  and ABD domain of the catalytic subunit was generated by combining the  $\Delta$ ABD-p110 $\delta$



structure (2WXH) with the recently solved structure of p110 $\alpha$  in complex with nSH2 (3HIZ) (Mandelker et al., 2009). The c-terminal helix of the kinase domain that is disordered in p110 $\delta$  is modeled (region H) from the structure of p110 $\gamma$  (1E7U) (Walker et al., 1999) (A) Peptides spanning the p110 $\delta$  catalytic subunit and the p85 $\alpha$  regulatory subunit and that showed greater than 0.5 Da changes in deuteration level in the presence of lipid vesicles are mapped onto the model according to the legend. Peptides are labeled A-K. All experiments were performed in duplicate. The graphs are labeled (\*) for any time points with a greater than 0.5 Da change between p110 $\delta$ +nicSH2 + pY in the presence of 1mg/ml of 5% PIP2 lipid vesicles.

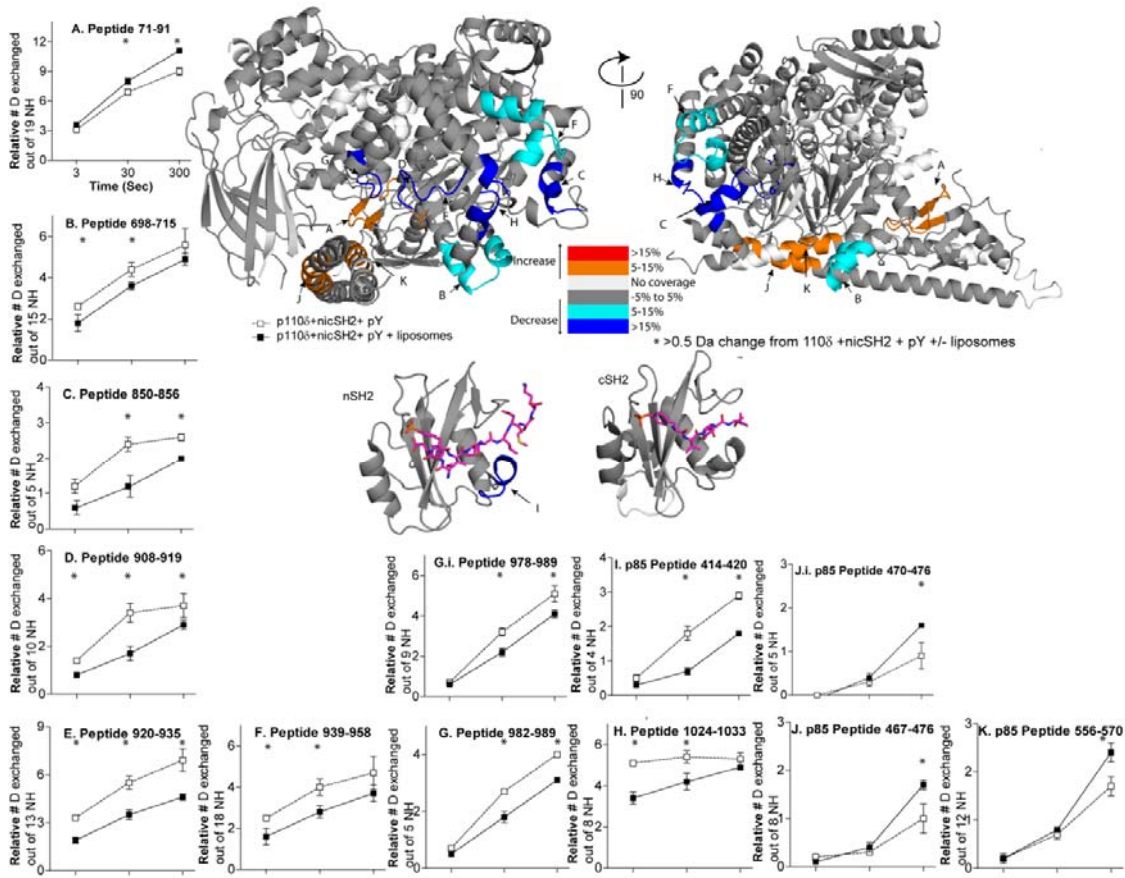

Figure S5

**Fig. S6.** Changes in deuterium exchange caused by K379E and Y685A mutations in p85 $\alpha$  nSH2 and cSH2 (complement to main figure 6). A. The relative deuterium level of peptides 524-529 and 920-935 of p110 $\delta$ , and peptides 444-456, and 704-710 of p85 $\alpha$  are shown for various conditions at 1000 seconds of on exchange. The relative deuterium level of p110 $\delta$  peptide 1023-1033 and p85 $\alpha$  peptide 414-420 for various conditions at 3 seconds of on exchange is also shown. This mutants were correctly folded as shown by their ability to still bind RTK pY peptide, as indicated by similar

decreases in exchange in the nSH2 (414-420) and cSH2 domains (704-710) for the mutant and wild type complexes. Changes in deuterium exchange for K379E and Y685A p85 constructs are shown for peptides 681-687 and 373-380 at 3 seconds of on exchange. An asterisk identifies that these experiments are not comparing the same peptide, for every condition. Mutant complexes contain peptides with different *m/z* and retention times due to engineered mutations in the sequence. B. A structural model of the interaction of p110 $\delta$  with the nSH2, iSH2 and cSH2 domains of p85 $\alpha$  was generated using the crystal structure of the free p110 $\delta$  catalytic subunit (2WXH), with the nSH2 from the recent p110 $\alpha$ /p85 $\alpha$  structure (3HHM), the iSH2 (2VIY), and the cSH2 from the recent p110 $\beta$ /p85 $\beta$  structure (2Y3A). Regions with changes upon phosphopeptide binding are colored in red and labeled on the model.

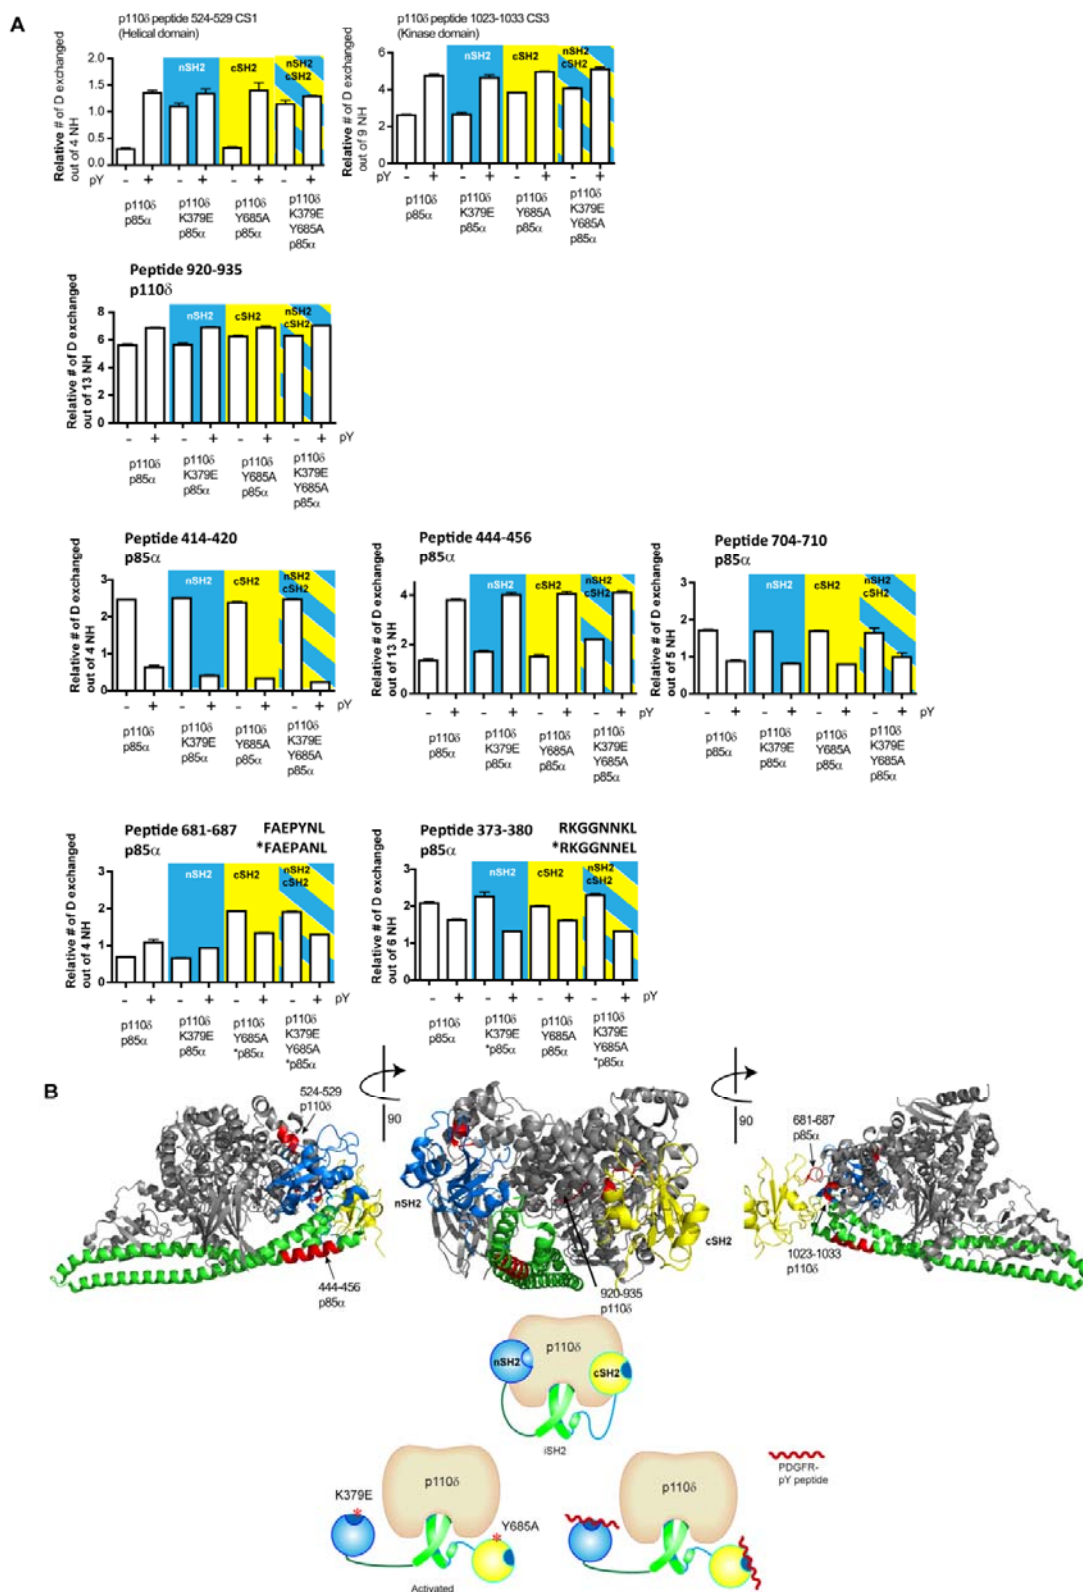

**Fig. S7.** MS Data processing methodology A. Representative UPLC - MS trace of the p110 $\delta$  FL + nicSH<sub>2</sub> p85 $\alpha$  construct peptide digest with pY peptide. B. Representative UPLC - MS trace of the

p110 $\delta$  FL + nicSH<sub>2</sub> p85 $\alpha$  construct peptide digest with pY peptide and phospholipid. No changes in UPLC performance were caused by the presence of phospholipid. C. Shown is the raw data for a selected peptide (1023-1033 charge state 3) that exhibits changes in the presence of nicSH<sub>2</sub> and phosphopeptide. Three different conditions are shown at three different time points (3 seconds on exchange at 0 °C, and 3 and 10 seconds of on exchange at 23 °C). The arrow represents the centroid mass calculated by the DXMS software (Sierra analytics). D. The fully processed data is shown for peptide 1023-1033 and peptide 524-529. The 3 seconds of on exchange at 0 °C is graphed as 1 second of on exchange to fit all data on the same graph. Error bars are calculated as the standard deviation of two separate independent experiments. These two peptides show very different deuterium exchange rate profiles. The shape of deuterium incorporation curves contains important structural information. In this example, peptide 1023-1033 covers an extremely flexible region that shows ~50% relative exchange (the real value will be 20-30% greater due to back exchange) in the  $\Delta$ ABD- p110 $\delta$  after 3 seconds. The presence of the nicSH<sub>2</sub> construct of p85 $\alpha$  causes a decrease in exchange, and this decrease is reversible with pY peptide. However, this region is ~50% exchanged after 10 seconds of on-exchange, even in the presence of the nicSH<sub>2</sub> construct indicating that this region remains highly flexible and solvent exposed relative to other regions in the protein. Peptide 524-529 represents a different situation where the peptide is completely protected in all conditions through 10 seconds of on exchange. After this time constructs lacking the nSH<sub>2</sub> or cSH<sub>2</sub> show a progressive incorporation of deuterium up to ~40-50% at 1000 seconds. The presence of the nicSH<sub>2</sub> construct prevents all exchange through 100 seconds and this decrease is reversible with pY peptide, but after this time deuterium incorporation begins. However even at 3000 seconds there is still significant protection by the nicSH<sub>2</sub> compared to the free subunit. This indicates that this region is conformationally rigid or solvent protected in the p85 $\alpha$  bound state, and that the removal of this contact by removal of the SH<sub>2</sub> domains or pY peptide binding exposes this region; however the region remains relatively rigid compared to a region like 1023-1033.

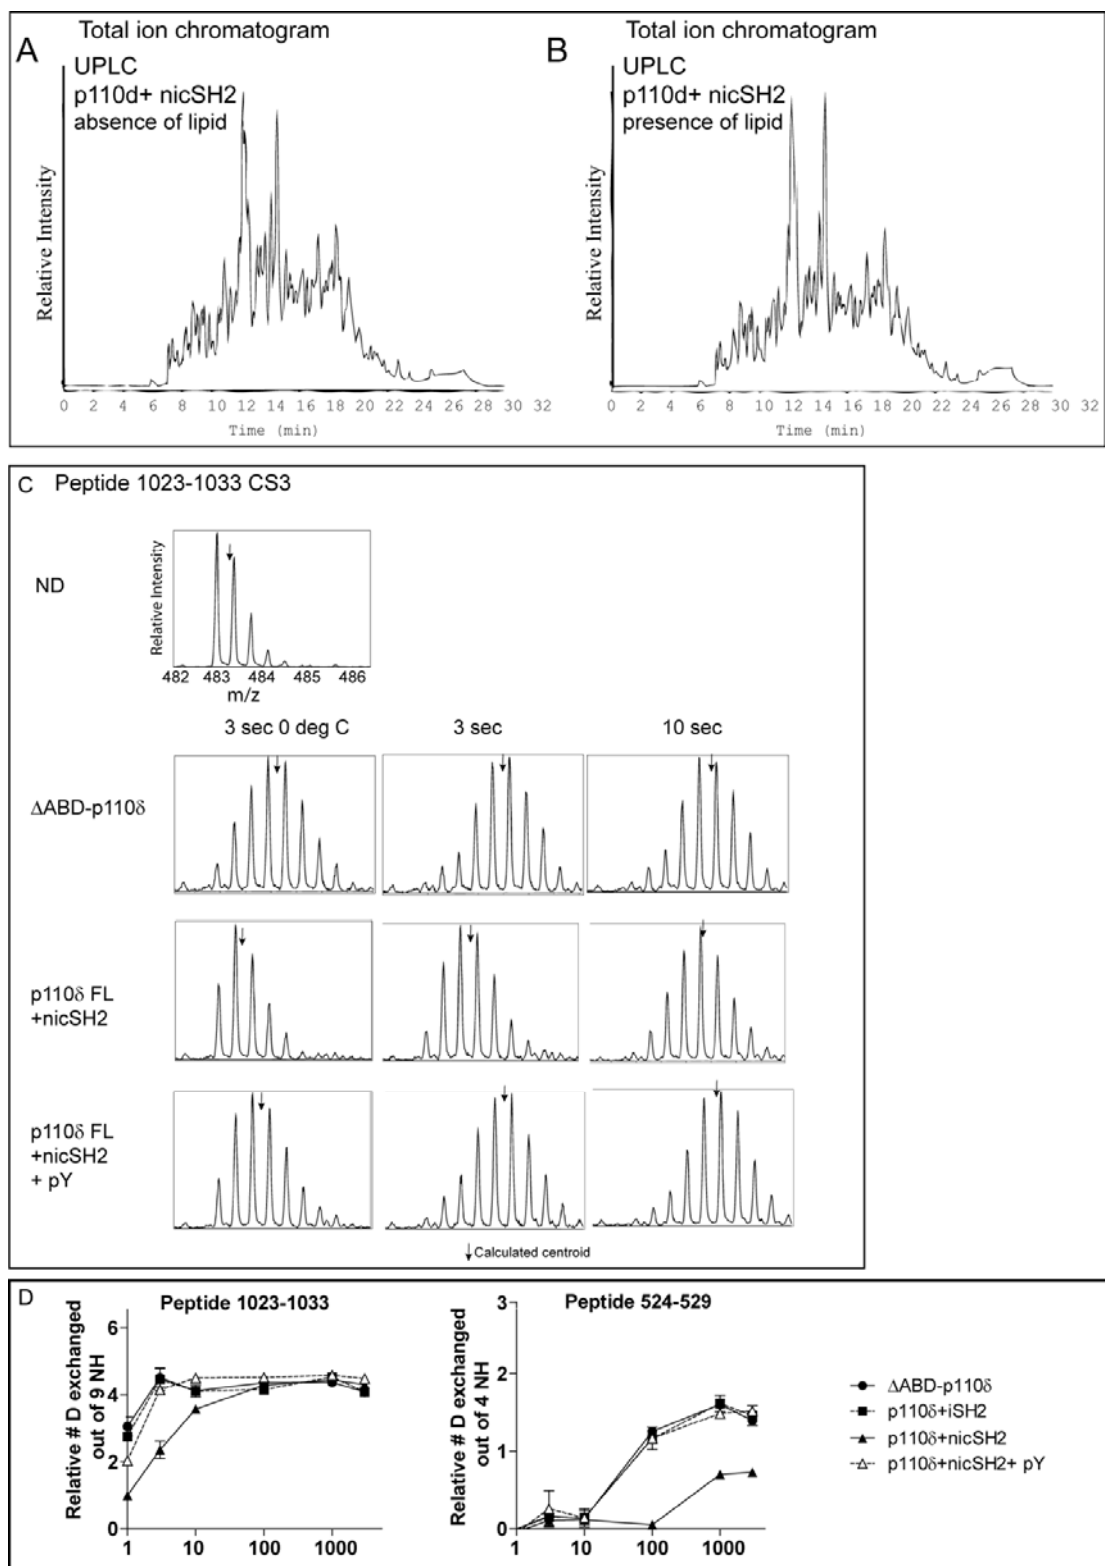

Fig. S7

**Tab. S1** Summary of all peptides analyzed for p85 constructs, pY peptide binding, and lipid binding.

A. All peptide exchange data for experiments with p85 constructs and pY peptide binding analyzed for the p110 $\delta$  catalytic subunit are shown for four conditions at six time points. The six time points are labelled for the four different conditions tested. B. All peptide exchange data for pY peptide binding analyzed for the p85 $\alpha$  regulatory subunit are shown for three conditions at six time points. The six time points are labelled for the four different conditions tested. C. All peptide exchange data for lipid binding experiments analyzed for the p110 $\delta$  and p85 $\alpha$  are shown for two conditions at three time points. The three time points are labelled for the two different conditions tested. The charge state (Z), maximal number of exchangeable amides (#D) residue start number (S), and residue end number (E) are displayed for every peptide. The relative level of exchange is colored according to the figure in the legend. The data listed is the average of two independent experiments.









Tab. SIC p110δ peptides

|    |   | p110δ+nicSH2 + pY |      |      | p110δ+nicSH2 + pY + liposomes |     |  |
|----|---|-------------------|------|------|-------------------------------|-----|--|
| #D | Z | Start             | End  | 3    | 30                            | 300 |  |
| 6  | 1 | 12                | 19   | 56%  | 56%                           | 57% |  |
| 5  | 1 | 24                | 31   | 4%   | 17%                           | 21% |  |
| 8  | 1 | 32                | 42   | 12%  | 25%                           | 27% |  |
| 16 | 4 | 43                | 61   | 6%   | 14%                           | 21% |  |
| 19 | 3 | 71                | 91   | 16%  | 36%                           | 46% |  |
| 8  | 3 | 86                | 96   | 13%  | 14%                           | 15% |  |
| 16 | 3 | 120               | 138  | 17%  | 25%                           | 28% |  |
| 16 | 4 | 120               | 138  | 16%  | 28%                           | 33% |  |
| 8  | 2 | 128               | 138  | 20%  | 34%                           | 41% |  |
| 13 | 2 | 150               | 164  | 4%   | 14%                           | 19% |  |
| 13 | 3 | 150               | 164  | 4%   | 15%                           | 25% |  |
| 11 | 2 | 163               | 177  | 22%  | 35%                           | 40% |  |
| 16 | 3 | 163               | 182  | 35%  | 46%                           | 47% |  |
| 14 | 3 | 165               | 182  | 40%  | 51%                           | 53% |  |
| 7  | 2 | 183               | 191  | 51%  | 56%                           | 63% |  |
| 7  | 1 | 192               | 200  | 31%  | 42%                           | 49% |  |
| 10 | 2 | 192               | 203  | 39%  | 50%                           | 55% |  |
| 11 | 2 | 203               | 216  | 11%  | 27%                           | 36% |  |
| 14 | 4 | 221               | 238  | 41%  | 58%                           | 60% |  |
| 7  | 2 | 228               | 238  | 54%  | 71%                           | 72% |  |
| 10 | 2 | 239               | 250  | 4%   | 4%                            | 4%  |  |
| 10 | 3 | 239               | 250  | 4%   | 5%                            | 6%  |  |
| 6  | 1 | 251               | 259  | 5%   | 3%                            | 2%  |  |
| 6  | 2 | 251               | 259  | 3%   | 3%                            | 2%  |  |
| 3  | 1 | 260               | 264  | 6%   | 8%                            | 18% |  |
| 14 | 3 | 267               | 283  | 9%   | 10%                           | 9%  |  |
| 7  | 1 | 275               | 283  | 1%   | 4%                            | 6%  |  |
| 7  | 2 | 275               | 283  | 2%   | 5%                            | 7%  |  |
| 5  | 1 | 317               | 324  | 10%  | 35%                           | 36% |  |
| 7  | 1 | 317               | 326  | 7%   | 25%                           | 25% |  |
| 7  | 2 | 317               | 326  | 7%   | 26%                           | 27% |  |
| 9  | 2 | 327               | 337  | 6%   | 24%                           | 27% |  |
| 8  | 2 | 328               | 337  | 8%   | 25%                           | 32% |  |
| 9  | 1 | 342               | 352  | 3%   | 5%                            | 7%  |  |
| 11 | 2 | 342               | 354  | 2%   | 8%                            | 7%  |  |
| 9  | 2 | 355               | 365  | 20%  | 33%                           | 43% |  |
| 9  | 2 | 366               | 377  | 10%  | 24%                           | 26% |  |
| 10 | 3 | 378               | 390  | 0%   | 1%                            | 7%  |  |
| 3  | 1 | 388               | 392  | 27%  | 28%                           | 38% |  |
| 11 | 2 | 426               | 438  | 14%  | 20%                           | 36% |  |
| 9  | 2 | 439               | 452  | 32%  | 36%                           | 36% |  |
| 9  | 2 | 440               | 452  | 34%  | 40%                           | 41% |  |
| 12 | 2 | 453               | 468  | 33%  | 52%                           | 72% |  |
| 10 | 2 | 471               | 485  | 7%   | 22%                           | 31% |  |
| 6  | 2 | 476               | 485  | 7%   | 23%                           | 39% |  |
| 4  | 1 | 516               | 523  | 53%  | 53%                           | 53% |  |
| 4  | 1 | 524               | 529  | 5%   | 15%                           | 29% |  |
| 20 | 3 | 524               | 546  | 1%   | 6%                            | 9%  |  |
| 20 | 4 | 524               | 546  | 2%   | 9%                            | 9%  |  |
| 20 | 5 | 524               | 546  | 2%   | 6%                            | 9%  |  |
| 14 | 4 | 530               | 546  | 7%   | 7%                            | 7%  |  |
| 13 | 2 | 550               | 564  | 0%   | 1%                            | 2%  |  |
| 4  | 1 | 568               | 574  | 7%   | 25%                           | 35% |  |
| 3  | 1 | 575               | 579  | 5%   | 28%                           | 57% |  |
| 11 | 3 | 596               | 608  | 11%  | 18%                           | 23% |  |
| 8  | 1 | 616               | 625  | 11%  | 26%                           | 33% |  |
| 8  | 2 | 616               | 625  | 15%  | 27%                           | 33% |  |
| 3  | 1 | 647               | 651  | 30%  | 29%                           | 30% |  |
| 3  | 2 | 647               | 651  | 4%   | 4%                            | 6%  |  |
| 6  | 3 | 648               | 655  | 1%   | -1%                           | 3%  |  |
| 5  | 1 | 662               | 668  | 4%   | 4%                            | 2%  |  |
| 5  | 2 | 662               | 668  | 1%   | 1%                            | 1%  |  |
| 4  | 1 | 684               | 689  | 3%   | 10%                           | 4%  |  |
| 3  | 1 | 693               | 697  | 8%   | 7%                            | 7%  |  |
| 15 | 3 | 698               | 715  | 18%  | 29%                           | 33% |  |
| 15 | 5 | 698               | 715  | 18%  | 30%                           | 33% |  |
| 4  | 1 | 720               | 725  | 33%  | 36%                           | 52% |  |
| 6  | 1 | 720               | 727  | 19%  | 29%                           | 50% |  |
| 11 | 2 | 726               | 740  | 3%   | 7%                            | 18% |  |
| 3  | 1 | 741               | 745  | -13% | -15%                          | -9% |  |
| 4  | 1 | 746               | 751  | 0%   | 6%                            | 21% |  |
| 8  | 2 | 752               | 762  | 13%  | 15%                           | 14% |  |
| 4  | 1 | 761               | 766  | 22%  | 36%                           | 35% |  |
| 7  | 2 | 776               | 784  | 17%  | 23%                           | 29% |  |
| 3  | 1 | 789               | 793  | 3%   | 3%                            | 3%  |  |
| 15 | 4 | 799               | 816  | 21%  | 26%                           | 29% |  |
| 5  | 2 | 801               | 807  | 5%   | 14%                           | 28% |  |
| 15 | 2 | 808               | 826  | 4%   | 4%                            | 6%  |  |
| 15 | 3 | 808               | 826  | 3%   | 4%                            | 6%  |  |
| 8  | 1 | 827               | 836  | 7%   | 17%                           | 17% |  |
| 8  | 2 | 827               | 836  | 11%  | 19%                           | 23% |  |
| 5  | 1 | 830               | 836  | 2%   | 3%                            | 7%  |  |
| 4  | 1 | 845               | 850  | 81%  | 80%                           | 83% |  |
| 5  | 2 | 850               | 856  | 24%  | 46%                           | 49% |  |
| 10 | 2 | 856               | 868  | 25%  | 41%                           | 41% |  |
| 10 | 3 | 856               | 868  | 24%  | 38%                           | 42% |  |
| 4  | 1 | 869               | 874  | 10%  | 8%                            | 13% |  |
| 5  | 1 | 875               | 881  | 1%   | 0%                            | 1%  |  |
| 3  | 1 | 882               | 886  | 3%   | 0%                            | 2%  |  |
| 13 | 3 | 886               | 900  | 3%   | 6%                            | 7%  |  |
| 5  | 2 | 901               | 907  | 7%   | 10%                           | 24% |  |
| 6  | 1 | 908               | 915  | 10%  | 21%                           | 19% |  |
| 6  | 2 | 908               | 915  | 8%   | 23%                           | 19% |  |
| 10 | 2 | 908               | 919  | 14%  | 34%                           | 34% |  |
| 10 | 3 | 908               | 919  | 14%  | 34%                           | 35% |  |
| 13 | 4 | 920               | 935  | 25%  | 42%                           | 49% |  |
| 18 | 5 | 939               | 958  | 14%  | 22%                           | 23% |  |
| 9  | 2 | 978               | 989  | 8%   | 35%                           | 53% |  |
| 5  | 2 | 982               | 989  | 13%  | 53%                           | 70% |  |
| 17 | 4 | 1001              | 1019 | 11%  | 17%                           | 22% |  |
| 8  | 3 | 1010              | 1019 | 3%   | 5%                            | 7%  |  |
| 9  | 4 | 1023              | 1033 | 64%  | 70%                           | 69% |  |
| 8  | 3 | 1024              | 1033 | 63%  | 66%                           | 64% |  |
| 9  | 2 | 1034              | 1044 | 53%  | 56%                           | 53% |  |
| 9  | 3 | 1034              | 1044 | 49%  | 53%                           | 50% |  |

p85α peptides

|    |   | p110δ+nicSH2 + pY |     |     | p110δ+nicSH2 + pY + liposomes |     |  |
|----|---|-------------------|-----|-----|-------------------------------|-----|--|
| #D | Z | Start             | End | 3   | 30                            | 300 |  |
| 7  | 1 | 333               | 341 | 21% | 26%                           | 39% |  |
| 7  | 2 | 333               | 341 | 20% | 27%                           | 38% |  |
| 6  | 1 | 334               | 341 | 30% | 37%                           | 45% |  |
| 6  | 2 | 334               | 341 | 25% | 31%                           | 42% |  |
| 6  | 2 | 342               | 349 | 4%  | 17%                           | 29% |  |
| 12 | 3 | 342               | 355 | 11% | 21%                           | 27% |  |
| 14 | 2 | 356               | 371 | 19% | 23%                           | 24% |  |
| 15 | 2 | 356               | 372 | 14% | 18%                           | 18% |  |
| 7  | 2 | 372               | 380 | 16% | 23%                           | 22% |  |
| 17 | 4 | 381               | 400 | 11% | 21%                           | 25% |  |
| 10 | 2 | 402               | 413 | 6%  | 18%                           | 26% |  |
| 10 | 3 | 402               | 413 | 7%  | 19%                           | 25% |  |
| 8  | 2 | 404               | 413 | 4%  | 20%                           | 27% |  |
| 7  | 1 | 405               | 413 | 6%  | 21%                           | 29% |  |
| 7  | 2 | 405               | 413 | 6%  | 21%                           | 29% |  |
| 4  | 1 | 414               | 420 | 11% | 43%                           | 67% |  |
| 4  | 2 | 414               | 420 | 12% | 44%                           | 71% |  |
| 12 | 3 | 421               | 435 | 27% | 41%                           | 39% |  |
| 20 | 4 | 421               | 443 | 36% | 47%                           | 46% |  |
| 11 | 2 | 444               | 456 | 2%  | 12%                           | 23% |  |
| 8  | 2 | 467               | 476 | 2%  | 4%                            | 10% |  |
| 5  | 2 | 470               | 476 | 0%  | 7%                            | 13% |  |
| 5  | 2 | 487               | 493 | 6%  | 7%                            | 18% |  |
| 7  | 2 | 487               | 495 | 3%  | 2%                            | 5%  |  |
| 6  | 2 | 488               | 495 | 2%  | 1%                            | 4%  |  |
| 15 | 4 | 521               | 537 | 3%  | 7%                            | 12% |  |
| 10 | 3 | 538               | 549 | 1%  | 1%                            | 3%  |  |
| 9  | 3 | 546               | 556 | 1%  | 2%                            | 3%  |  |
| 12 | 3 | 556               | 570 | 2%  | 6%                            | 12% |  |
| 9  | 2 | 571               | 581 | 1%  | 3%                            | 8%  |  |
| 9  | 3 | 571               | 581 | 2%  | 3%                            | 11% |  |
| 6  | 3 | 574               | 581 | 3%  | 3%                            | 7%  |  |
| 8  | 1 | 597               | 606 | 43% | 50%                           | 41% |  |
| 25 | 3 | 610               | 637 | 9%  | 16%                           | 17% |  |
| 25 | 4 | 610               | 637 | 8%  | 15%                           | 15% |  |
| 25 | 5 | 610               | 637 | 8%  | 16%                           | 16% |  |
| 21 | 4 | 614               | 637 | 9%  | 9%                            | 17% |  |
| 8  | 2 | 647               | 656 | 27% | 36%                           | 40% |  |
| 9  | 2 | 647               | 657 | 19% | 26%                           | 29% |  |
| 18 | 4 | 661               | 680 | 10% | 19%                           | 22% |  |
| 24 | 3 | 661               | 687 | 10% | 21%                           | 24% |  |
| 4  | 1 | 681               | 687 | 32% | 54%                           | 63% |  |
| 4  | 2 | 688               | 693 | 22% | 40%                           | 43% |  |
| 8  | 3 | 694               | 703 | 5%  | 9%                            | 9%  |  |
| 5  | 2 | 697               | 703 | 6%  | 12%                           | 13% |  |
| 5  | 1 | 704               | 710 | 2%  | 5%                            | 15% |  |
| 5  | 2 | 704               | 710 | 3%  | 5%                            | 14% |  |
| 6  | 1 | 711               | 719 | 2%  | 3%                            | 8%  |  |
| 11 | 3 | 711               | 724 | 29% | 36%                           | 43% |  |

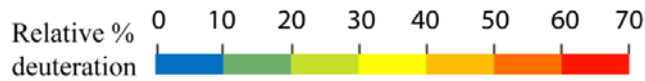

## SI Materials and Methods

### Protein expression and purification.

The  $\Delta$ ABD-p110 $\delta$  was expressed as previously described (Berndt et al., 2010). In short for expression of all protein complexes 1 to 8 liters of *Spodoptera frugiperda* (Sf9) cells at a density of  $1.0 \times 10^6$  cells/mL were co-infected with an optimized ratio of viruses encoding complexes of the catalytic and regulatory subunit. The catalytic subunit contained an N-terminal 6xhis-tag followed by a TEV protease site, while the regulatory subunit was untagged. After 48-63 hr infection at 27°C, cells were harvested and washed with ice-cold phosphate-buffered saline (PBS). The  $\Delta$ ABD-p110 $\delta$  was expressed as a complex of the full length p110 $\delta$  with a TEV protease site engineered after the ABD domain with the iSH2 domain of p85 $\alpha$ . The Sf9 cell pellets were lysed in 100 mls of 20 mM Tris pH-8.0, 100 mM NaCl, 5% glycerol, 10 mM Imidazole, and 2 mM  $\beta$ -mercaptoethanol, with one complete EDTA free protease inhibitor tablet added (Roche). Cells were lysed with a 4 minute probe sonication followed by centrifugation for 30 minutes at 140,000 g. The supernatant was then passed through a 0.45  $\mu$ m Minisart filter unit (Sartorius Biotech). This filtrate was then passed over one 5 ml HisTrap FF column (GE healthcare). The column was washed with up to 30 mM imidazole and then eluted with a gradient of 0-100% buffer B (20 mM Tris pH-8.0, 100 mM NaCl, 5% glycerol, 300mM Imidazole, and 2 mM beta-mercaptoethanol). The pooled fractions were then added onto a 5 ml Heparin HP column (GE healthcare) and washed with buffer C (20 mM Tris pH 8, 100 mM NaCl, 2 mM DTT) and eluted with a 0-100% gradient of buffer D (20mM Tris pH 8, 2 mM DTT, 1 M NaCl). The  $\Delta$ ABD-p110 $\delta$  construct was generated by an overnight incubation with a 1:10 w/w ratio with TEV protease in the presence of 10 mM  $\beta$ -mercaptoethanol. All other p110 $\delta$ /p85 $\alpha$  heterodimers still contained the N-terminal his-tag, however kinase assays on p110 $\delta$ /p85 $\alpha$  nicSH2 heterodimers with and without the 6xhis-tag removed by TEV cleavage showed similar results (Data not shown). Both the  $\Delta$ ABD-p110 $\delta$  or p110 $\delta$ /p85 $\alpha$  heterodimers were then concentrated to 1.5 ml using a amicon 50k centrifugal filter (Millipore) and injected on a Superdex 1660 gel filtration column (GE healthcare) pre equilibrated with buffer E (20 mM Tris pH-7.2, 50 mM ammonium sulfate, 1% ethylene glycol, and 5 mM DTT). Fractions were collected and concentrated to 30  $\mu$ M using a amicon 50k centrifugal filter (Millipore) and then aliquoted and frozen in liquid nitrogen.

### **Lipid vesicle preparation**

Vesicles were prepared by adding the lipid components together in chloroform and evaporating organic solvent under a stream of dry argon. The lipid film was allowed to dry for thirty minutes under vacuum, and was then resuspended in a 20 mM Tris pH-7.5, 100 mM KCl, and 1 mM EGTA solution. The lipids were first bath sonicated for ten minutes, and then subjected to ten cycles of freeze-thaw between liquid nitrogen and a 42 °C water bath. The liposomes were finally extruded eleven times through a 100 nm filter using a mini extruder (Avanti Polar Lipids). Vesicles were frozen at -80 °C and used within one week of preparation.

### **Protein lipid FRET assays**

Vesicles were prepared exactly the same as above except with the inclusion of 10% dansyl PS (Avanti polar lipids). Two different types of lipid vesicles were prepared, one with 5% PIP2 (5% brain PIP2, 20% brain PS, 10% Dansyl PS, 35% brain PE, 15% brain PC, 10% cholesterol, and 5% sphingomyelin), and one with 0% PIP2 with the extra lipid composed of brain PS (25% brain PS, all other components the same). Protein solutions were allowed to preincubate with 10  $\mu$ M pY peptide for 10 minutes before addition of lipid vesicles. Vesicles were 5 fold diluted with 20 mM tris pH-7.5, 100 mM NaCl, to give a concentration of to 200  $\mu$ g/ml. 5  $\mu$ l of the lipid mixture was mixed with 5  $\mu$ l of a varying concentration of protein constructs, giving a final buffer of 100  $\mu$ g/ml lipid, 20 mM tris pH-7.5, 90 mM NaCl, 10 mM KCl, 100  $\mu$ M EGTA. The protein lipid mixture was allowed to equilibrate for 15 minutes. Reactions were measured using a PHERASStar HTS microplate reader (BMG Labtech) using a 280 nm excitation filter with 350 nm and 520 nm emission filters to measure Trp and Dansyl-PS FRET emissions, respectively. The FRET signal shown on the Y-axis is  $(I-I_0)$ , where I is the intensity at 520 nm, where  $I_0$  is the intensity for a solution with lipid only (without protein).

### **Akt phosphorylation assay**

Phoenix cells (HEK-derived cells, Orbigen) grown in 35 mm-diameter wells were transfected with pMIG vectors (Kulathu et al., 2008) expressing myc-p110 $\delta$  and FLAG-p85 $\alpha$  wild-type or mutant using Genejuice (Novagen) as described by the manufacturer. Cells were grown for 24 h, starved for

15 h in serum-free media and lysed with ice-cold lysis buffer [20 mM Tris-HCl pH 7.4, 150 mM sodium chloride, 1 mM EDTA, 1 mM EGTA, 1% Nonidet P40 (BDH laboratories), 2.5 mM sodium pyrophosphate, 10 mM sodium fluoride, 0.25% sodium deoxycholate, 1 mM AEBSF (Melford), 10 mM sodium orthovanadate and 1X protease inhibitors mixture (Roche)]. Cell lysates were sonicated, clarified by centrifugation and the amount of protein quantified by Bradford assay. Equal amounts of lysates in SDS buffer were separated by 4%-12% Bis-Tris acrylamide gels and transferred to a PVDF membrane for immunoblotting. Mouse antibodies recognizing Akt and phospho-Akt (Ser473) (Cell Signaling Technology), myc (Santa Cruz), FLAG (Sigma) and actin (Boster Biological Technology) were used as primary antibodies. Horseradish peroxidase (HRP)-conjugated anti-mouse antibody (Santa Cruz) was employed as a secondary antibody and the proteins detected with SuperSignal West Pico Chemiluminescent Substrate (ThermoScientific). Quantification of western blots was performed using GeneTools software (Syngene). Intervening unrelated samples between vector and p110 $\delta$ /p85 $\alpha$  constructs have been removed as indicated by dotted line in Fig 7.

### **Measurement of deuterium incorporation**

Samples were thawed rapidly on ice and then injected onto an online HPLC system that was immersed in ice. The protein was run over an immobilized pepsin column (Applied Biosystems, Poroszyme®, 2-3131-00) at 100  $\mu$ l/min, and collected over a C18 peptide trap (Michrom, TR1/25109/2) for five minutes. The trap was then switched in line with a 5  $\mu$ m particle, 50 mm x 1 mm C18 column (Discovery sciences, 218MS5105) with a guard column and peptides were eluted by a 5-45% gradient of buffer A (0.1% formic acid) and buffer B (80% acetonitrile, 20% H<sub>2</sub>O, 0.02% formic acid) over thirty minutes and injected onto a Sciex QStar Pulsar hybrid QqTOF (Applied Biosystems) which collected mass spectra from a range of 350 to 1500 m/z.

Lipid binding, nucleotide binding, and p85 point mutation experiments were performed with an online UPLC system which replaced the C18 peptide trap with a 1.7  $\mu$ m particle van-guard pre column (Waters), and used an Acquity® 1.7  $\mu$ m particle, 100 mm x 1 mm C18 column (Waters). The UPLC system allowed separations to be carried out with a 20 minute gradient from 5-45% B. Mass analysis of the peptide centroids was performed as described previously using the software DXMS (Sierra Analytics) and is described below (Fig S7) (Burke et al., 2008). For lipid binding experiments there

was concern that the lipid might cause problems with UPLC performance and possible ion suppression. Our experiments showed that the lipid was retained on the column throughout the run with no negative effects on UPLC column performance (Fig. S7). The entire UPLC setup was flushed with 80% acetonitrile for 30 min at the end of the experiment to fully elute all lipid. The UPLC setup allowed for a faster and more efficient peptide separation, however this did cause changes in back exchange rates compared to HPLC runs. For this reason none of the comparisons in the manuscript were performed between HPLC and UPLC experiments, and were only performed under similar experimental protocols.

### **Protein digestion and peptide identification**

Different digestion conditions were employed to optimize the peptide digestion map. These optimizations included changing denaturant concentration, flow rate over pepsin, and denaturation time (See below for optimal conditions). Peptide identification was performed by running tandem MS/MS experiments using a Sciex QStar Pulsar hybrid QqTOF (Applied Biosystems). IDA (information dependent acquisition) MS/MS experiments were performed with Analyst 2.0 with a 1 second TOF MS scan from 350-1500 m/z followed by two 1.5 second product ion scans with a capillary voltage of 5300 V. Data was analyzed using Mascot software v. 2.2 (Matrix Science) to identify peptides based on fragmentation and peptide mass. The MS tolerance was set at 30 ppm with a MS/MS tolerance of 0.2 Da. All peptides with both a mascot score >10 and a parent mass error smaller than 20 ppm were analyzed by the DXMS software (Sierra Analytics). Any peptides with a mascot score from 10 to 20 were further manually checked to see if there were any possible false identifications, and any ambiguous peptides were deleted from the peptide pool. The total list of peptides were then manually validated by searching a non deuterated TOF MS scan to test for correct m/z state, and check for the presence of overlapping peptides. Although the DXMS software was used to automate the initial analysis afterwards every peptide shown in the paper was manually verified at every timepoint and replicate to check for correct charge state, m/z range, presence of overlapping peptides, and proper retention time.

## Mass analysis of peptide centroids

All selected peptides passed the quality control threshold of the DXMS software, and were then manually examined for accurate identification and deuterium incorporation. There was a correction for on-exchange made by adding deuterium after the quench buffer was added. This value was subtracted from all deuterium exchange experiments. For this reason some peptides have a negative value of exchange in Table S1. Attempts were made at generating a fully deuterated sample, but were not successful, and for this reason results are shown as relative levels of deuteration with no correction for back exchange as described previously (Iacob et al., 2009). The only correction made was correcting for the level of deuterium in the exchange buffer (82%) (66% in lipid binding experiments). The real level of deuteration will be ~25-35% higher than what is shown, based on tests performed with fully deuterated standard peptides. All experiments were repeated in duplicate, and we found that the average error was  $\leq 0.2$  Da for non-corrected data, and for this reason we consider all non corrected changes between conditions of greater than 0.5 Da significant. The resulting deuterium incorporation was graphed versus the on-exchange time. The 3 seconds at 0 °C time point was graphed as 1 second in all on-exchange graphs to fit all data to the same graph. Full deuterium exchange methodology is described (Figure S7), and all deuterium exchange data for all peptides analyzed for phosphopeptide / p85 constructs (~240 peptides) is shown in tabular form (Tab. S1A, S1B). For lipid binding experiments we used less protein to maximize the ratio of lipid to protein. For this reason fewer peptides were able to be followed, but still over 150 peptides between the catalytic and regulatory subunit were quantified for deuterium incorporation (Tab. S1C).

## Supplemental references

Bondeva, T., Pirola, L., Bulgarelli-Leva, G., Rubio, I., Wetzker, R., and Wymann, M.P. (1998). Bifurcation of lipid and protein kinase signals of PI3Kgamma to the protein kinases PKB and MAPK. *Science* 282, 293-296.

Fu, Z., Aronoff-Spencer, E., Wu, H., Gerfen, G.J., and Backer, J.M. (2004). The iSH2 domain of PI 3-kinase is a rigid tether for p110 and not a conformational switch. *Arch Biochem Biophys* 432, 244-251.

Iacob, R.E., Pene-Dumitrescu, T., Zhang, J., Gray, N.S., Smithgall, T.E., and Engen, J.R. (2009). Conformational disturbance in Abl kinase upon mutation and deregulation. *Proc Natl Acad Sci U S A* 106, 1386-1391.

Kulathu, Y., Hobeika, E., Turchinovich, G., and Reth, M. (2008). The kinase Syk as an adaptor controlling sustained calcium signalling and B-cell development. *EMBO J* 27, 1333-1344.
